# Supplementary material for: Targeted RNA Knockdown by a Type III CRISPR-Cas Complex in Zebrafish
Source: PubMed Central journal article supplement (PMC7469701; doi:10.1089/crispr.2020.0032), 2020-08-24

**Figure S4: *Tg(ddx4:ddx4-EGFP)* in reciprocal crosses. Related to Figure 3.** *Tg(ddx4:ddx4-EGFP)* fluorescence was monitored in reciprocal crosses of ABTL and *Tg(ddx4:ddx4-EGFP)* parents.

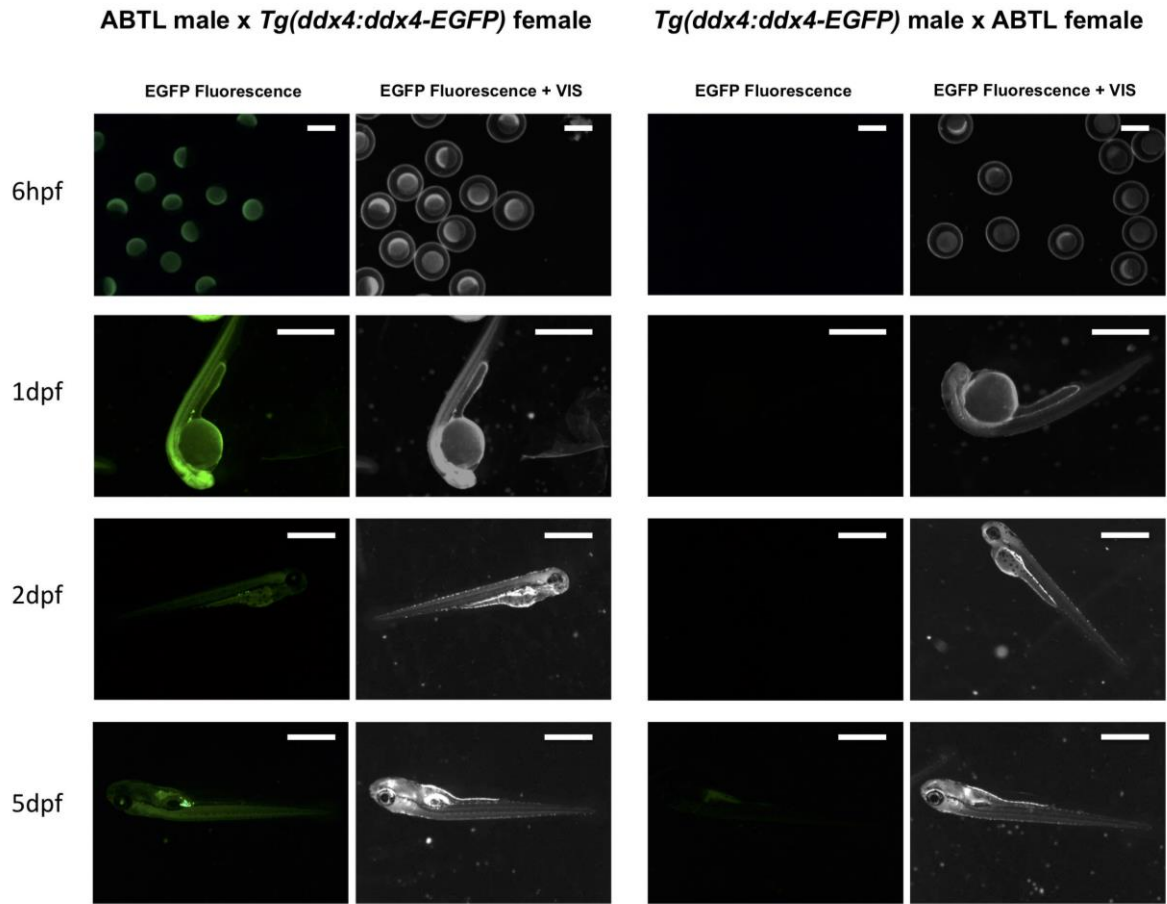

Supplement: Supp_Fig4.pdf [file Supp_Fig4.pdf]
