# Supplementary material for: Targeted RNA Knockdown by a Type III CRISPR-Cas Complex in Zebrafish
Source: PubMed Central journal article supplement (PMC7469701; doi:10.1089/crispr.2020.0032), 2020-08-24

**Figure S5: Lack of toxicity and dose response. Related to Figure 3.** (A) StCsm(*EGFP*) complexes were tolerated up to the highest tested doses of 2.5 ng, or 5-times the efficacious doses. Even at the high dose, no overt phenotypic changes were observed. Arrows point to germ cells. (B) The dose dependence of *Tg(ddx4:ddx4-EGFP)* knockdown was monitored for 1nl injections. At 0.5 mg/ml, the majority of embryos did not show EGFP fluorescence in germ cells.

**A**

Lack of toxicity

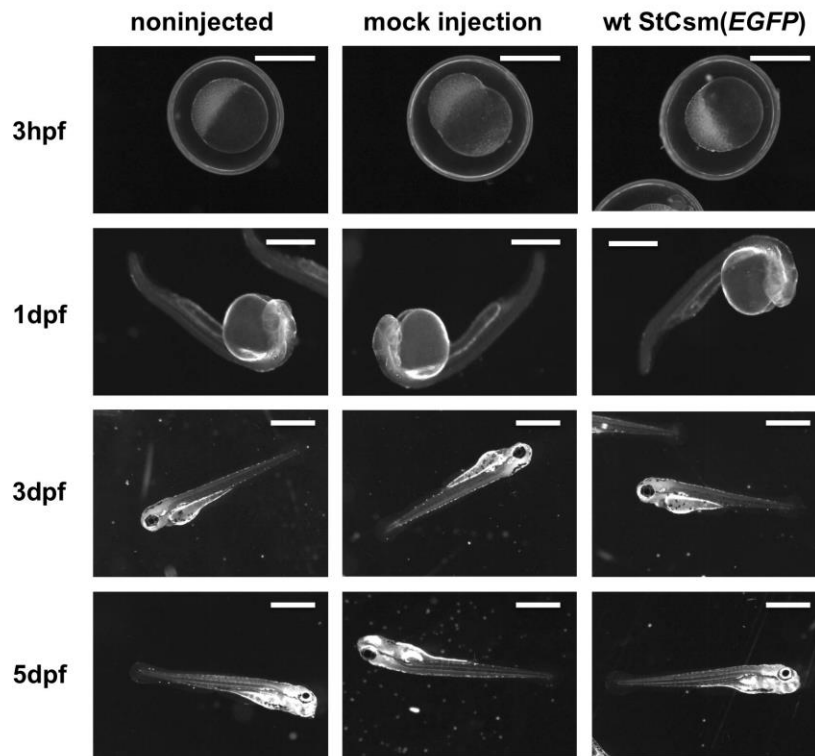

**B**

Dose response

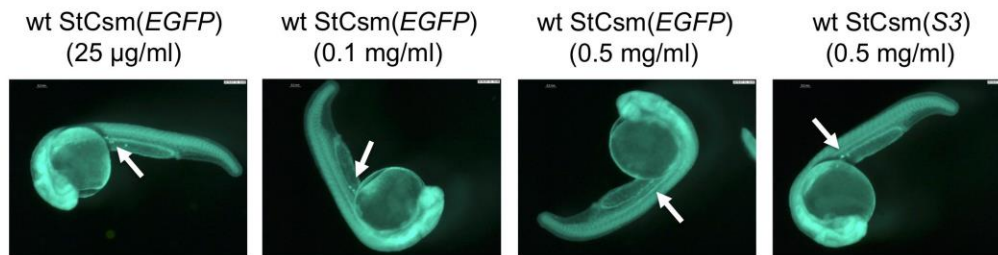

Supplement: Supp_Fig5.pdf [file Supp_Fig5.pdf]
