# Supplementary material for: Targeted RNA Knockdown by a Type III CRISPR-Cas Complex in Zebrafish
Source: PubMed Central journal article supplement (PMC7469701; doi:10.1089/crispr.2020.0032), 2020-08-24

**Figure S6: *Tg(Xla.Eef1a1:mlsEGFP)* in reciprocal crosses. Related to Figure 3.** (A) *Tg(Xla.Eef1a1:mlsEGFP)* fluorescence was monitored in reciprocal crosses of ABTL and *Tg(Xla.Eef1a1:mlsEGFP)* parents. (B) Mean fluorescence was quantified 1dpf by FACS analysis of digested embryos. Results are from three independent experiments; error bars represent one standard deviation. \*\*\*  $P < 0.001$  as compared with respective controls.

**A** *mlsEGFP* is a maternal and zygotic transgene

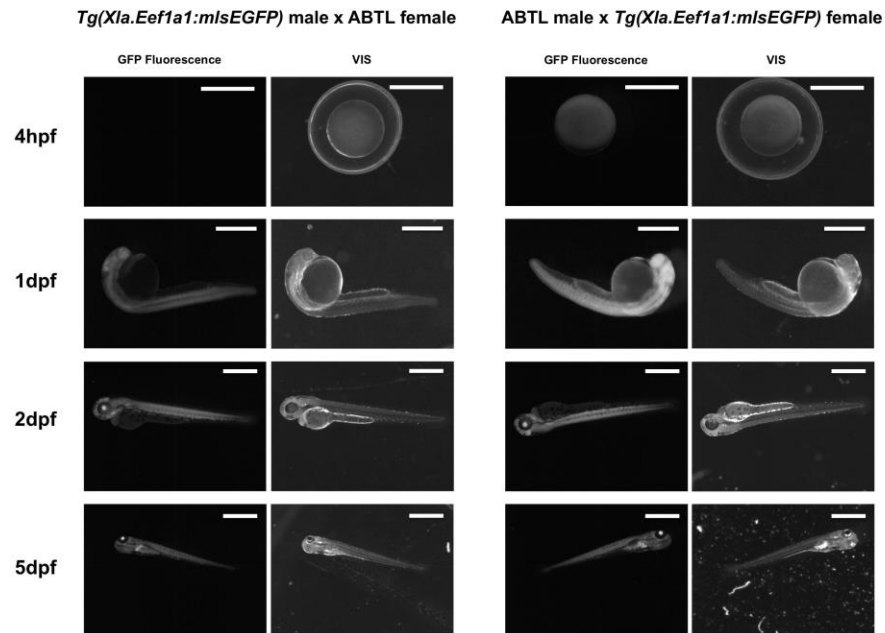

**B** *mlsEGFP* knockdown with StCsm(*EGFP*) in crosses with ABTL

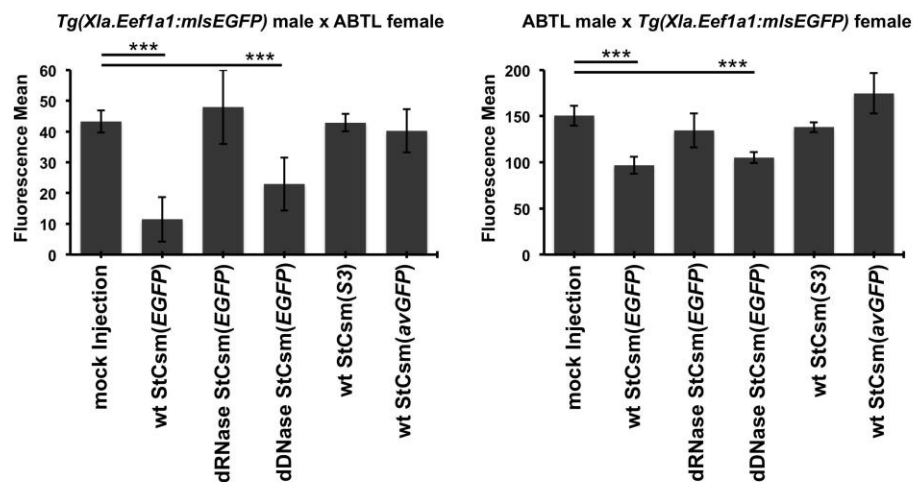

Supplement: Supp_Fig6.pdf [file Supp_Fig6.pdf]
