# Supplementary material for: Targeted RNA Knockdown by a Type III CRISPR-Cas Complex in Zebrafish
Source: PubMed Central journal article supplement (PMC7469701; doi:10.1089/crispr.2020.0032), 2020-08-24

**Figure S7: *Tg(myI7:GFP)* knockdown. Related to Figure 3.** The effect of the injection of StCsm crRNA complexes into *Tg(myI7:GFP)* embryos was monitored.

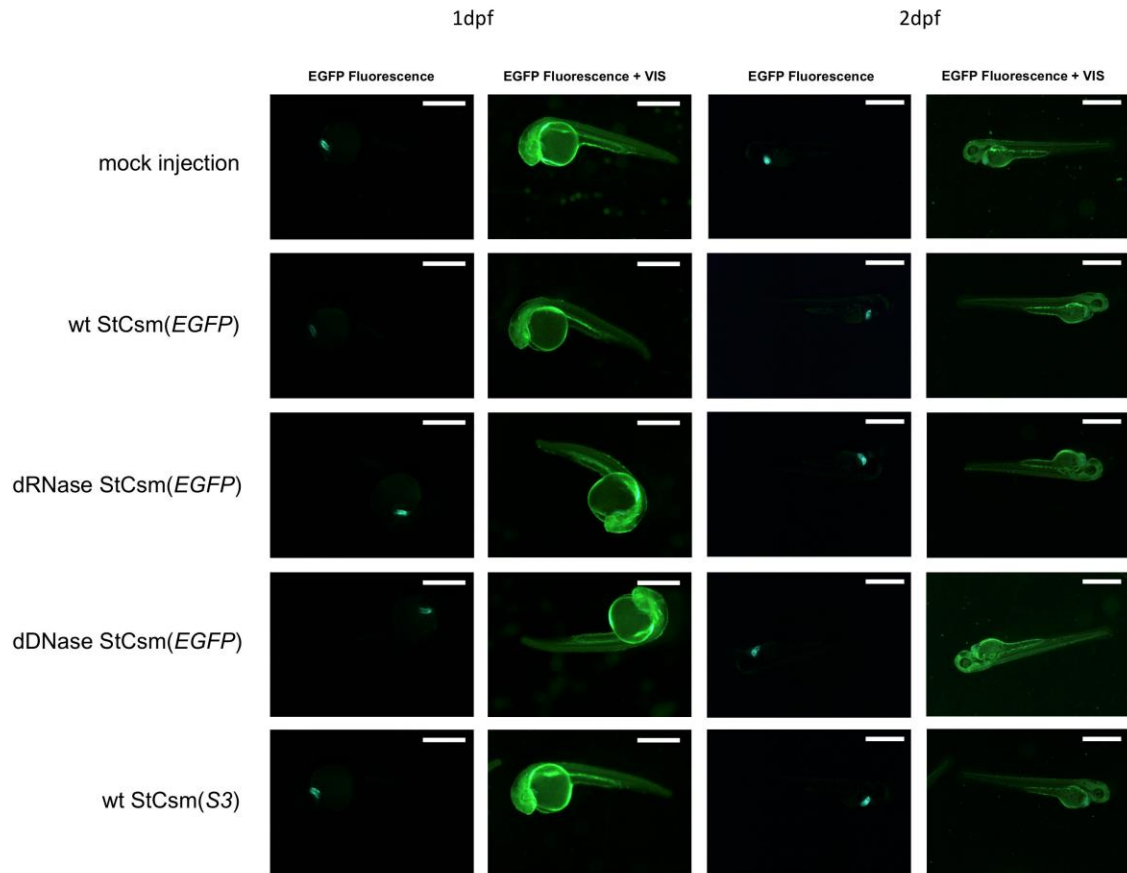

Supplement: Supp_Fig7.pdf [file Supp_Fig7.pdf]
