# Supplementary material for: Targeted RNA Knockdown by a Type III CRISPR-Cas Complex in Zebrafish
Source: PubMed Central journal article supplement (PMC7469701; doi:10.1089/crispr.2020.0032), 2020-08-24

**Figure S11: Effect of *EGFP* knockdown across the transcriptome. Related to Figure 6.** (A) Correlation heatmap and hierarchical clustering of Euclidean sample-to-sample distance show that developmental stage dominates the transcriptome, and that injection condition has only minor effects on the overall transcriptome. (B) MA plots of log<sub>2</sub> fold changes of read counts over the mean of normalized counts for all tested time points. The plots have different y-axis scale. Every point in the scatterplot represents a gene. Genes with adjusted p-value lower than 0.1 are colored red. (C) Number of matching nucleotides is not a good predictor for off-target effect. The dependency of the Wald test statistic, as calculated by DESeq2 for the StCsm(*EGFP*) and Mock injected samples at 128 cell stage, on the number of complementary nucleotides to the crRNA. The hue of the points visualizes the log<sub>2</sub> fold change between the experimental conditions. The higher the absolute value of the Wald test statistic is, the more statistically significant is the observed change.

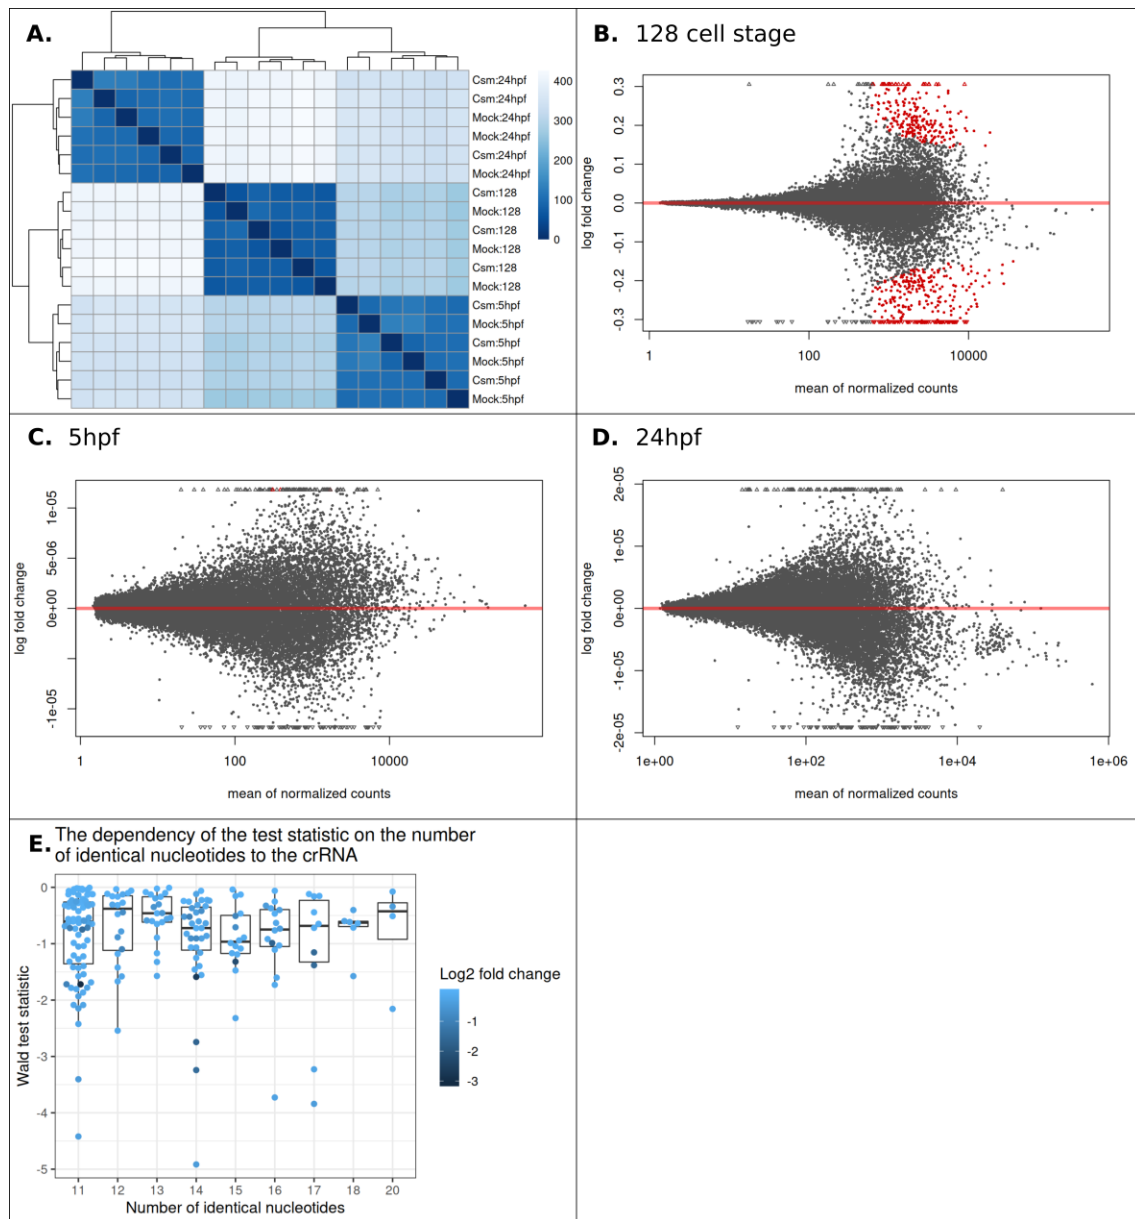

Supplement: Supp_Fig11.pdf [file Supp_Fig11.pdf]
